CORRECTION

## Correction: A critical analysis of marine carbon sequestration opportunities in South Korea

The *PLOS Climate* Staff

### Notice of Republication

This article was republished on August 13, 2025, to correct an error in the author list: Author Ho-Sung Yoon should be marked as the joint corresponding author with Peter I. Macreadie.

The publisher apologises for the error. Please download this article again to view the correct version. The originally published, uncorrected article and the republished, corrected article are provided here for reference.

### Supporting information

**S1 File. Originally published, uncorrected article.**  
(PDF)

**S2 File. Republished, corrected article.**  
(PDF)

### Reference

1. Macreadie PI, Ross FWR, Duarte CM, Won Hong J, Yoon H-S. A critical analysis of marine carbon sequestration opportunities in South Korea. *PLOS Clim*. 2025;4(5):e0000591. <https://doi.org/10.1371/journal.pclm.0000591>

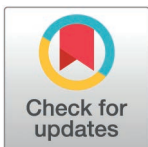

### OPEN ACCESS

**Citation:** The *PLOS Climate* Staff (2025) Correction: A critical analysis of marine carbon sequestration opportunities in South Korea. *PLOS Clim* 4(9): e0000718. <https://doi.org/10.1371/journal.pclm.0000718>

**Published:** September 23, 2025

**Copyright:** © 2025 The *PLOS Climate* Staff. This is an open access article distributed under the terms of the [Creative Commons Attribution License](https://creativecommons.org/licenses/by/4.0/), which permits unrestricted use, distribution, and reproduction in any medium, provided the original author and source are credited.
